# Supplementary material for: Purkinje cell development and degeneration in the spastic Han-Wistar rat model of ataxia
Source: Research Square preprint supplement (doi:10.21203/rs.3.rs-7706512/v1), 2025-10-27
Supplement: Supplementary file 1 [file bf8c36c3d5cdb80e85c4447d.docx]

**Supplementary**

**
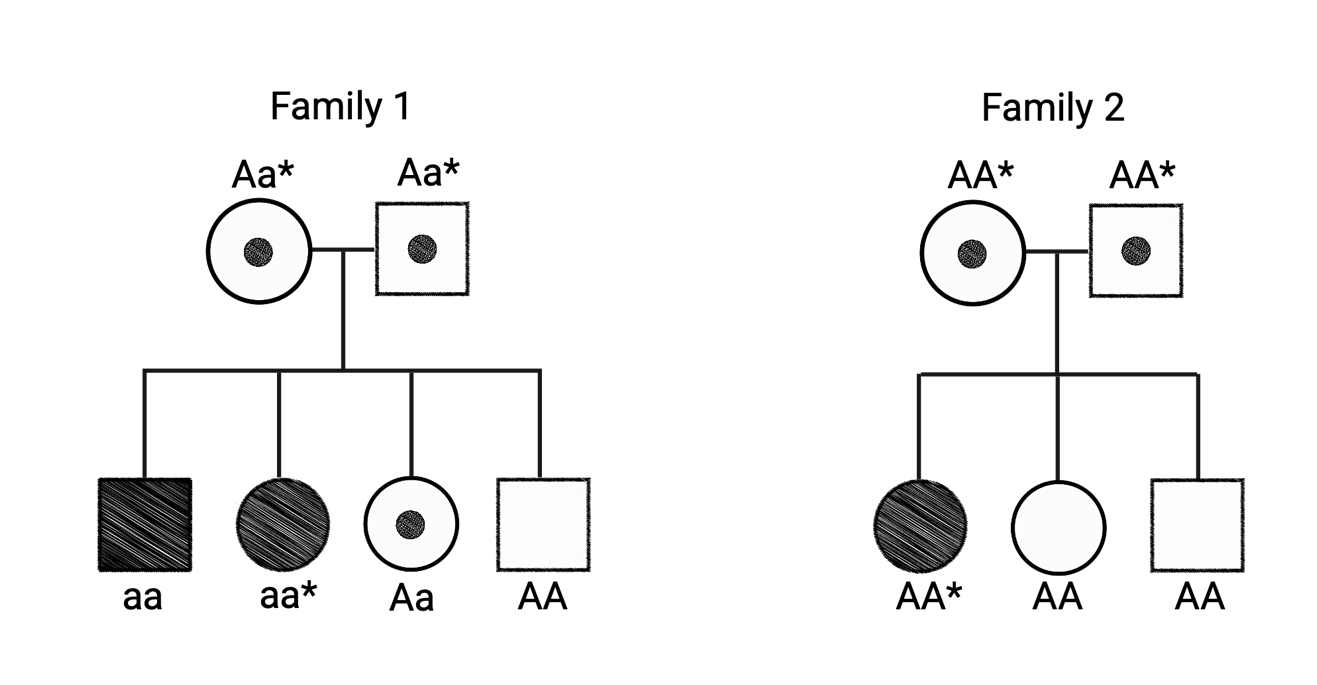
**

**Supplementary Figure 1.** Pedigrees for candidate gene validation. In Family 1, whole-genome

sequencing was performed on the mother, father, and one affected offspring (marked with an asterisk). Sanger sequencing of the Sbf2 gene was performed for all individuals in both families.

**Supplementary Table 1.** Candidate genes identified from WGS and filtered by predicted impact and disease relevance.

| **Gene Symbol** | **Predicted Impact** | **Chromosome Position** | **Variant** | **Predicted Function** | **Associated diseases in humans** | **Brain expression**  **(Human Atlas Protein)** |
| --- | --- | --- | --- | --- | --- | --- |
| *Sbf2** | High | chr1:175154510 | ENSRNOT00000013126.7:c. 1788+16789_1788+16792del | phosphatase binding activity | Charcot-Marie-Tooth Disease, Type 4B2 | Neuronal and Glial cells |
| *Rhot2* | Moderate | chr10:15207579 | ENSRNOT00000027083.5:c.1277G>A|ENSRNOP00000027083.3:p.Arg426Gln | GTP binding activity and  GTPase activity | Charcot-Marie-Tooth Disease Type 4; [3-Methylglutaconic Aciduria, Type I](http://www.malacards.org/card/3_methylglutaconic_aciduria_type_iii)II | Cerebellum; Neuronal cells |
| *Sh3bp4* | Moderate | chr9:96279068 | ENSRNOT00000026312.4:c.1789G>A|ENSRNOP00000026312.2:p.Ala597Thr | GDP-dissociation inhibitor  activity and small GTPase  binding activity | Charcot-Marie-Tooth Disease Type 1A | Glial cells |
| *Abi2* | Moderate | chr9:67282241 | ENSRNOT00000050179.5:c.1253A>G|ENSRNOP00000050008.5:p.Tyr418Cys | SH3 domain binding activity;  proline-rich region binding activity;  and ubiquitin protein ligase  binding activity. | [Developmental And Epileptic Encephalopathy 65](http://www.malacards.org/card/developmental_and_epileptic_encephalopathy_65); Autosomal Recessive Limb-Girdle Muscular Dystrophy Type 2H | Neuronal and Glial cells |
| *Cplane1* | Moderate | chr2:57324788  chr2:57332058  chr2:57332208 | ENSRNOT00000063899.3:c.5657A>G|ENSRNOP00000060886.3:p.Asp1886Gly  ENSRNOT00000063899.3:c.6478G>A|ENSRNOP00000060886.3:p.Ala2160Thr  ENSRNOT00000063899.3:c.6628T>C|ENSRNOP00000060886.3:p.Ser2210Pro | Cilium assembly | [Ciliopathies](https://pathcards.genecards.org/card/ciliopathies); Joubert syndrome | Neuronal and Glial cells |
| *Stradb* | Moderate | chr9:65781702 | ENSRNOT00000043558.2:c.1178C>T|ENSRNOP00000049160.2:p.Ala393Val | Activation of protein kinase activity  and protein export from nucleus | Amyotrophic Lateral Sclerosis 2, Juvenile. | Neuronal and Glial cells (low) |
| *Eif2ak2* | Moderate | chr6:1431196 | ENSRNOT00000072810.2:c.1387G>A|ENSRNOP00000067694.2:p.Val463Ile | Double-stranded RNA binding activity; eukaryotic translation initiation factor 2alpha kinase activity | [Dystonia 33](http://www.malacards.org/card/dystonia_33); Leukoencephalopathy, Developmental Delay; Episodic Neurologic Regression Syndrome | Neuronal and Glial cells |
| *Pkd1l2* | Moderate | chr19:49550350  chr19:49592225  chr19:49596537 | ENSRNOT00000071130.2:c.6196G>A|ENSRNOP00000064630.2:p.Asp2066Asn  ENSRNOT00000071130.2:c.2488C>T|ENSRNOP00000064630.2:p.Arg830Cys  ENSRNOT00000071130.2:c.2332G>A|ENSRNOP00000064630.2:p.Val778Met | Calcium channel activity; detection  of mechanical stimulus | Otosclerosis 4; [Long Qt Syndrome](http://www.malacards.org/card/long_qt_syndrome) | Neuronal and Glial cells |
| *Randp9* | Moderate | chr17:24021748  chr17:24021760 | XM_008771586.1:c.2246G>A|XP_008769808.1:p.Arg749Lys  XM_008771586.1:c.2234C>T|XP_008769808.1:p.Ser745Leu | Cytoskeleton organization and negative regulation of ERK1 and ERK2 cascade | [Masa Syndrome](http://www.malacards.org/card/masa_syndrome); Lissencephaly | Neuronal and Glial cells |
| *Caprin2* | Moderate | chr4:183346989 | ENSRNOT00000074740.3:c.849+1573A>G | Positive regulation of canonical Wnt signaling pathway; positive regulation of dendritic spine morphogenesis; positive regulation of transcription by RNA polymerase II | Combined Oxidative Phosphorylation Deficiency 32 | Neuronal and Glial cells |

**Supplementary Table 2**. Functional annotation classified the variants into 273 genes (high, moderate, low).

| **High Impact** |
| --- |
| LOC498152 |
| Olr1593 |
| Gsr |
| AABR07027267.1 |
| Cep192 |
| AABR07043288.1 |
| AABR07003433.1 |
| Sbf2 |
| AABR07005821.1 |
| Slc22a12 |
| RGD1624210 |
| Bche |
| AABR07007839.1 |
| Eef1akmt3 |
| AABR07057436.1 |
| Snrpe |
| Mettl21cl1 |
| **Moderate Impact** |
| Enpp7 |
| Rhot2 |
| Prr35 |
| Capn15 |
| Olr1401 |
| Abca9 |
| Tmprss15 |
| AABR07033357.1 |
| Htr1f |
| AABR07033047.1 |
| Olr1539 |
| Kng1 |
| LOC498152 |
| LOC102546864 |
| LOC498154 |
| Adap1 |
| Zfp68 |
| MGC112692 |
| LOC288521 |
| Cyp3a9 |
| Mcm7 |
| Taf6 |
| Mblac1 |
| Vom2r62 |
| Vom2r64 |
| AABR07035776.1 |
| Ache |
| AABR07035791.1 |
| Atp6v0a2 |
| Mphosph9 |
| AABR07035074.1 |
| Vom2r60 |
| Rps6kc1 |
| Flvcr1 |
| Nsl1 |
| AABR07022157.1 |
| Hhat |
| Sertad4 |
| Traf3ip3 |
| Hsd11b1 |
| G0s2 |
| Lamb3 |
| Cntnap5b |
| AABR07021804.1 |
| Mnda |
| Olr1585 |
| Olr1587 |
| Olr1592 |
| Olr1593 |
| Olr1595 |
| Olr1596 |
| Spta1 |
| Olr1600 |
| AABR07021812.1 |
| AABR07021930.1 |
| LOC498300 |
| Nvl |
| Ccdc121 |
| RGD1565660 |
| Vom2r73 |
| Evc2 |
| Evc |
| Wfs1 |
| Olr1611 |
| Olr1297 |
| AABR07026048.1 |
| AABR07024441.1 |
| Kcnu1 |
| Defa8 |
| AABR07026536.1 |
| F10 |
| AABR07027235.1 |
| Prl7a3 |
| Prl7b1 |
| Prl8a7 |
| AABR07027637.1 |
| Prtfdc1 |
| Thnsl1 |
| AABR07028839.1 |
| AABR07043288.1 |
| Pkd1l2 |
| Hsd17b2 |
| Htatip2 |
| AABR07003433.1 |
| Ulbp1 |
| Agbl1 |
| Thap12 |
| Stk33 |
| Trim66 |
| Akip1 |
| LOC499240 |
| Lyve1 |
| Bub3 |
| Slc18b1 |
| Trip13 |
| Vom1r6 |
| LOC102552527 |
| LOC102555377 |
| Zfp579 |
| Sult2a1 |
| Rpl9 |
| Bicra |
| Zfp541 |
| LOC108349752 |
| Psgb1 |
| AABR07002659.1 |
| LOC102557244 |
| AC093995.2 |
| Mill1 |
| Ppp1r13l |
| AABR07002680.2 |
| Ceacam19 |
| Ceacam20 |
| AABR07002683.1 |
| Zfp111 |
| Zfp61 |
| C4a |
| AABR07044383.1 |
| LOC103690108 |
| RGD1624210 |
| RT1-CE4 |
| AABR07044408.1 |
| AABR07010333.1 |
| Vom2r46 |
| AABR07011057.1 |
| Wdr49 |
| Abca4 |
| Dnttip2 |
| Pde5a |
| Synpo2 |
| Prss12 |
| Enpep |
| Tbck |
| Cxxc4 |
| Slc9b2 |
| Manba |
| Odf2l |
| Nexn |
| Ak5 |
| Arhgef28 |
| Gfm2 |
| Hexb |
| Tmem174 |
| Map1b |
| Marveld2 |
| Cdk7 |
| Cenph |
| Cplane1 |
| Pdzd2 |
| Slc10a5 |
| AC121203.3 |
| Slc28a2 |
| LOC680432 |
| Ckap2l |
| Il1a |
| Aar2 |
| LOC100359951 |
| Lypd6b |
| Erich2 |
| Slc25a12 |
| Cerkl |
| Olr528 |
| Olr701 |
| Fgl2 |
| AABR07059243.1 |
| Mthfd2 |
| Cd207 |
| Magi1 |
| Ier3ip1 |
| AABR07061532.1 |
| AABR07061614.1 |
| Il17rc |
| Olr829 |
| Plekhg6 |
| Samd9 |
| AABR07059663.1 |
| Galnt11 |
| Agap3 |
| Atg9b |
| Nupl2 |
| Doxl2 |
| Orc5 |
| Lypla1 |
| Fbxo10 |
| Frmpd1 |
| AABR07048419.2 |
| AABR07065139.2 |
| Msh6 |
| AC123293.2 |
| Eif2ak2 |
| Cebpz |
| Ndufaf7 |
| Klf11 |
| LOC108349290 |
| Vezt |
| Fgd6 |
| AABR07056686.1 |
| Olr956 |
| Tspan31 |
| RGD1565117 |
| Nxph4 |
| LOC100365958 |
| Tac3 |
| Gpr182 |
| AABR07057436.1 |
| Stag1 |
| Col6a6 |
| Col6a5 |
| Susd5 |
| Tcaim |
| Zkscan7 |
| RGD1311745 |
| Htr3b |
| Dus3l |
| AABR07066648.1 |
| Satb1 |
| Smap1 |
| AABR07067520.1 |
| Col5a2 |
| Asnsd1 |
| RGD1306941 |
| Sgo2 |
| Aox1 |
| Aox3 |
| Aox4 |
| Stradb |
| AABR07067814.1 |
| Abi2 |
| Vom2r79 |
| Adgre1 |
| Sh3bp4 |
| C3 |
| Dennd1c |
| **Low Impact** |
| Cadm2 |
| Adap1 |
| Cyp3a62 |
| AABR07035074.1 |
| Spta1 |
| Gsr |
| Ranbp9 |
| Pkd1l2 |
| Plcg2 |
| Zfp61 |
| LOC103690108 |
| Hexb |
| Il1a |
| Gpd2 |
| Hoxd9 |
| Caprin2 |
| AABR07059663.1 |
| Fbxo10 |
| Mon2 |
| AABR07057436.1 |
| Cnot10 |
| Aox3 |
| AABR07067810.2 |
| Aox4 |
